# Supplementary material for: Identification of Genomic Targets of Transcription Factor Aebp1 and its role in Survival of Glioma Cells
Source: Oxford University Press journal article supplement (doi:10.1158/1541-7786.mcr-11-0488), 2012-06-22
Supplement: 15417786mcr110488-sup-t6_xls_52k.xls [file 15417786mcr110488-sup-t6_xls_52k.xls]

## Sheet: Sheet1
Supplementary Table 6 List of genes related to Apoptosis, Cell Cycle, Cell Proliferation and Cell Differentiation
Gene Symbol	Gene ID	Regulation	Fold Change	p-value	Function
ACTL6B	51412	up	3.42001	0.0332766	Cell cycle
ACVR2B	93	up	2.76064	0.00117044	Cell differentiation, Cell proliferation
ASCL1	429	up	1.60346	0.0170664	Cell differentiation, Regulation of apoptosis
ASCL2	430	up	3.25048	0.0228255	Cell differentiation, Cell proliferation, Cell division
ASPH	444	up	3.11	0.0119567	Cell cycle
AXIN1	8312	up	1.63883	0.0113672	Cell cycle, Cell proliferation, Cell differentiation,Cell division, Regulation of apoptosis
BICD1	636	up	2.29974	0.0324976	Cell cycle
BIRC3	330	up	1.96593	0.00952419	Cell cycle, Cell proliferation,Cell division, Regulation of apoptosis
BLZF1	8548	up	3.17765	0.0379756	Cell proliferation
C1GALT1C1	29071	up	1.72394	0.012774	Cell differentiaition
CAMTA1	23261	up	3.91491	0.0455599	Cell differentiation
CD164	8763	up	1.54719	0.00359108	Cell cycle, Cell differentiation, Cell proliferation
CD200	4345	up	3.29384	0.0202814	Cell cycle, Cell differentiation, Cell proliferation and Regulation of apoptosis
CDH13	1012	up	1.82579	0.00213374	Cell cycle, Cell proliferation, Regulation of apoptosis
CDK6	1021	up	1.89988	0.0187556	Cell cycle, Cell proliferation, Cell differentiation,Cell division, Regulation of apoptosis
CDKN2C	1031	up	4.7044	0.0253383	Cell cycle, Cell differentiation, Cell proliferation, Cell division and Regulation of apoptosis
CLINT1	9685	up	2.92785	0.0184732	Cell division
CLTC	1213	up	4.57312	0.0260908	Cell cycle , Cell division
CMTM8	152189	up	2.33548	0.00848316	Cell cycle ,Cell proliferation and Regulation of apoptosis
CTCFL	140690	up	2.01667	0.0054263	Cell cycle, Cell division, Cell proliferation
CTGF	1490	up	2.63714	0.0186056	Cell cycle, Cell proliferation, Cell differentiation,Cell division, Regulation of apoptosis
CYGB	114757	up	2.40763	0.0465879	Cell differentiation
CYP1B1	1545	up	1.62175	0.00957728	Cell cycle, Cell differentiation, Cell proliferation and Regulation of apoptosis
DAB2	1601	up	1.85978	0.0177857	Cell cycle, Cell division, Cell proliferation and Regulation of apoptsis
DICER1	23405	up	1.82886	0.0122855	Regulation of Apoptosis
DUSP16	80824	up	1.56598	0.00874777	Cell division and regulation of apoptosis
EGLN1	54583	up	3.17955	0.00411014	Cell cycle, Cell proliferation and Regulation of apoptosis
ELF5	2001	up	2.16947	0.036152	Cell proliferation
ENTPD5	957	up	3.0268	0.0159306	Cell cycle, Cell proliferation, Cell division and Regulation of apoptosis
EPAS1	2034	up	3.21234	0.0381231	Cell differentiation, Cell proliferation and Regulation of apoptosis
EPHA4	2043	up	2.29135	0.0121344	Cell cycle, Cell division, Cell proliferation
ERBB2IP	55914	up	2.76457	0.00842884	Cell cycle, Cell differentiation, Cell proliferation, Cell division and Regulation of apoptosis
GSTA4	2941	up	1.50166	0.00397101	Cell cycle, Cell proliferation and Regulation of apoptosis
H2AFJ	55766	up	2.39066	0.00280716	Cell cycle, Cell division
HIPK3	10114	up	1.60693	0.00985535	Regulation of Apoptosis
IGF2	3481	up	2.00365	0.0137822	Cell cycle, Cell differentiation, Cell proliferation, Cell division and Regulation of apoptosis
IL4R	3566	up	3.86309	0.0205581	Cell cycle, Cell differentiation,Cell proliferation and Regulation of apoptosis
IRS2	8660	up	2.1198	0.0216556	Cell proliferation and Regulation of apoptosis
IRS2	8660	up	2.1198	0.0216556	Cell Proliferation
ITGB1	3688	up	2.87959	0.0491338	Cell cycle, Cell differentiation, Cell proliferation, Cell division and Regulation of apoptosis
ITGB1	3688	up	2.87959	0.0491338	Cell Cycle, Cell Differentiation
ITGB3	3690	up	1.63455	0.00296876	Cell Proliferation
KLF4	9314	up	1.5989	0.00822678	Cell cycle, Cell differentiation, Cell proliferation, Cell division and Regulation of apoptosis
KRT31	3881	up	1.90334	0.00474659	Cell differentiation
LAMA3	3909	up	1.88875	0.0126484	Cell cycle, Cell proliferation and Regulation of apoptosis
LAMA4	3910	up	5.05908	0.00403556	Cell Differentiation
LCMT2	9836	up	2.39099	0.0206451	Cell cycle
MDM2	4193	up	2.63812	0.0447851	Cell cycle, Cell differentiation, Cell proliferation, Cell division and Regulation of apoptosis
MDM2	4193	up	2.63812	0.0447851	Cell Cycle, Cell proliferation
MX1	4599	up	2.4534	0.00206488	Regulation of Apoptosis
MX1	4599	up	2.4534	0.00206488	Regulation of Apoptosis
MYOZ2	51778	up	2.30081	0.00928415	Cell division
NIT1	4817	up	1.89554	0.0048497	Regulation of Apoptosis
OPN5	221391	up	5.78245	0.0218594	Cell proliferation
PA2G4	5036	up	1.704	0.00285307	Cell cycle, Cell proliferation and Regulation of apoptosis
PAG1	55824	up	2.22247	0.0229116	Cell proliferation, Cell cycle
PAK2	5062	up	2.04853	0.0340337	Cell cycle, Cell division, Cell proliferation and Regulation of apoptsis
PAK2	5062	up	2.04853	0.0340337	Regulation of Apoptosis
PARD6B	84612	up	3.54324	0.0197056	Cell Cycle
PARP10	84875	up	2.3404	0.0253208	Cell cycle, Cell division, Cell proliferation
PCDH10	57575	up	4.86378	0.0277812	Cell cycle
PDGFB	5155	up	5.38306	0.0108932	Cell cycle, Cell differentiation, Cell proliferation, Cell division and Regulation of apoptosis
PDGFB	5155	up	5.38306	0.0108932	Cell Proliferation
PPARA	5465	up	1.54909	0.00996733	Cell cycle, Cell differentiation, Cell proliferation, Cell division and Regulation of apoptosis
PPP2R2C	5522	up	1.55621	0.0192063	Cell cycle, Cell division
PRR5	55615	up	2.24699	0.0474505	Cell cycle
PRR5	55615	up	2.24699	0.0474505	Cell Cycle
PTP4A1	7803	up	1.55377	0.00280492	Cell cycle, Cell division, Cell proliferation
PTP4A1	7803	up	1.55377	0.00280492	Cell Cycle
PTPRB	5787	up	3.24842	0.00919556	Cell cycle, Cell proliferation
PTPRR	5801	up	2.87255	0.0197718	Cell cycle, Cell division, Cell proliferation
RELN	5649	up	2.22103	0.00196185	Regulation of Apoptosis
RELN	5649	up	2.22103	0.00196185	Cell Differentiation
RFFL	117584	up	2.32115	0.0158107	Regulation of Apoptosis
RPA4	29935	up	1.75435	0.0124611	Cell cycle
RPA4	29935	up	1.75435	0.0124611	Cell Cycle
SCIN	85477	up	3.11827	0.0446748	Cell Proliferation
SERPINB2	5055	up	3.4042	0.0347791	Regulation of Apoptosis
SESN1	27244	up	1.73538	0.0122464	Cell Cycle, Cell proliferation
SIPA1L3	23094	up	1.53032	0.0142689	Cell proliferation
SLC19A1	6573	up	1.53008	0.0141827	Cell differentiation, Cell proliferation and Regulation of apoptosis
SNX9	51429	up	1.66023	0.00413847	Cell cycle, Cell division, Cell proliferation and Regulation of apoptsis
SOX1	6656	up	2.65886	0.0381658	Cell differentiation, Cell proliferation, Cell division
STAG1	10274	up	3.20562	0.0450644	Cell Cycle
TNFAIP3	7128	up	1.63065	0.00910015	Cell cycle, Cell differentiation and Regulation of apoptosis
TNFAIP3	7128	up	1.63065	0.00910015	Regulation of Apoptosis
TNFRSF10D	8793	up	2.0372	0.00396985	Regulation of Apoptosis
TNFSF14	8740	up	4.06649	0.0266908	Regulation of Apoptosis, Cell Proliferation
TNS1	7145	up	1.73694	0.0151616	Cell proliferation, Cell division and Regulation of apoptosis
TOX	9760	up	2.00504	0.0372825	Cell cycle
TP53	7157	up	2.03853	0.0393086	Cell Cycle
TP53INP1	94241	up	2.03853	0.0393086	Cell cycle, Cell prolferation and Regulation of apoptosis
UBE3A	7337	up	2.87962	0.0326789	Regulation of Apoptosis
USP31	57478	up	1.9646	0.00311978	Cell cycle
USP8	9101	up	2.6547	0.0281665	Cell cycle, Cell proliferation
USP8	9101	up	2.6547	0.0281665	Cell Cycle. Cell proliferation
AHI1	54806	down	1.54983	0.00822713	Cell differentiation, Regulation of apoptosis
ADAMTS2	9509	down	5.63205	0.00358531	Cell diffirentiation
ADRB1	153	down	2.56522	0.0445545	Cell cycle, Cell differentiation, Cell proliferation, Cell division
ARL6IP1	54806	down	1.54983	0.00822713	Regulation of Apoptosis
ARNT	56938	down	2.81769	0.00019	Cell cycle, Cell division, Regulation of apoptosis
ATF6	22926	down	1.94651	0.011373	Regulation of Apoptosis
ATP2B1	490	down	1.67972	0.0137037	Cell cycle, Cell proliferation
B2M	567	down	1.56525	0.00860734	Cell cycle, Cell differentiation
BCL11A	53335	down	4.40894	0.00125686	Cell differentiation
BIRC5	332	down	1.86659	0.00545626	Cell cycle, Cell differentiation, Cell proliferation, Cell division and Regulation of apoptosis
CA3	761	down	2.41068	0.0276506	Cell proliferation
CADPS2	93664	down	1.95113	0.0131957	Cell differentiation
CAMK2D	817	down	1.69618	0.00173911	Regulation of Apoptosis
CBR1	873	down	1.73669	0.00580242	Regulation of Apoptosis
CCDC43	124808	down	2.11812	0.0125268	Cell cycle
CCNF	899	down	1.55776	0.0125848	Cell cycle, Cell division
CD93	22918	down	3.26037	0.0310526	Cell cycle, Cell differentiation, Regulation of apoptosis
CIAPIN1	57019	down	2.22377	0.0264203	Cell differentiation, Cell proliferation and Regulation of apoptosis
CIB2	10518	down	1.63482	0.00905001	Cell divison, Cell proliferation, Cell differentiation and Regulation of apoptosis
CRISP3	10321	down	5.57782	0.0388116	Cell proliferation
CSNK2A2	1459	down	1.63271	0.0154897	Cell cycle, cell division
CSRP2BP	57325	down	1.97959	0.0166954	Cell cycle
DBF4B	80174	down	2.03683	0.0230657	Cell cycle, Cell proliferation
DEGS1	8560	down	1.53439	0.00195967	Cell cycle
DMTF1	9988	down	4.37728	0.0427288	Cell cycle
DUT	1854	down	1.5427	0.0132601	Cell cycle, Cell division, Cell proliferation and Regulation of apoptsis
EPHA3	2042	down	3.05618	0.0210014	Cell cycle and Regulation of apoptosis
EXOC7	23265	down	1.61913	0.0092235	Cell differentiation and Regulation of apoptosis
FHL2	2274	down	1.6544	0.00585968	Cell differentiation, Cell proliferation and Regulation of apoptosis
GAP43	2596	down	2.98225	0.0468473	Cell division,Cell differentiation, Cell proliferation
GNB5	10681	down	1.95415	0.00820519	Cell cycle
GRIA1	2890	down	3.52752	0.0388794	Cell division and Regulation of apoptosis
GRIK2	2898	down	2.47392	0.0463263	Cell differentiation and Regulation of apoptosis
HDAC1	3065	down	1.84585	0.000142	Cell cycle, Cell differentiation, Cell proliferation, Cell division and Regulation of apoptosis
HDAC6	10013	down	2.22213	0.0414201	Cell cycle and Regulation of apoptosis
HPGD	3248	down	1.91482	0.0150231	Cell cycle, Cell proliferation
HTR3C	170572	down	2.44964	0.022829	Cell cycle, Cell division
IFNB1	3456	down	2.19439	0.0226448	Cell proliferation and Regulation of apoptosis
IL17A	3605	down	4.15069	0.0393754	Cell cycle, Cell differentiation, Cell proliferation, Cell division and Regulation of apoptosis
IL1F7	27178	down	3.02628	0.0232008	Regulation of Apoptosis
IRS1	3667	down	1.65172	0.00269201	Cell Proliferation
ITGA6	3655	down	1.51232	0.00535265	Cell cycle, Cell differentiation, Cell proliferation, Cell division and Regulation of apoptosis
ITPR2	3709	down	1.72988	0.0158085	Cell division and regulation of apoptosis
KIF2C	11004	down	2.70404	0.00105585	Cell Cycle
MAP4	4134	down	1.81746	0.0140743	Cell division, Cell proliferation
MAPK13	5603	down	2.22962	0.0319059	Cell cycle, Cell division, Cell proliferation and Regulation of apoptsis
MAPK13	5603	down	2.22962	0.0319059	Cell Cycle
MCF2	4168	down	2.64714	0.00156744	Cell cycle
MEF2B	100271849	down	2.1434	0.0170191	Cell Proliferation
MK167	4288	down	1.7674	0.00915135	Cell Cycle, Cell proliferation
MMP28	79148	down	3.42619	0.0160778	Cell proliferation
NCKIPSD	51517	down	2.2656	0.00332921	Cell cycle
NFATC1	4772	down	4.11431	0.0125588	Cell cycle, Cell differentiation, Cell proliferation, Cell division and Regulation of apoptosis
NGEF	25791	down	2.09245	0.00788834	Cell cycle, Cell Differentiation
NGEF	25791	down	2.09245	0.00788834	Cell Differentiation, Regulation of Apoptosis
NRAS	4893	down	2.26548	0.0134518	Cell cycle, Cell differentiation, Cell proliferation, Cell division and Regulation of apoptosis
NRAS	4893	down	2.26548	0.0134518	Cell Proliferation, Cell Differentiation, Regulation of Apoptosis
NUB1	51667	down	1.65144	0.00255708	Cell cycle
NUCKS1	64710	down	2.7012	0.00107979	Cell cycle
PCCB	5096	down	1.65143	0.00133394	Cell cycle
PELO	53918	down	2.56272	0.0441123	Cell cycle, Cell differentiation, Cell division
PICALM	8301	down	1.78343	0.00397118	Cell differentiation
PIGK	10026	down	2.16129	0.0247751	Cell division
PIK3CB	5291	down	1.57725	0.0191049	Cell cycle, Cell division, Cell proliferation and Regulation of apoptsis
PLA2G12A	81579	down	2.16096	0.00101544	Cell cycle and Regulation of apoptosis
PRIM2A	5558	down	4.05641	0.0031386	Cell Proliferation
PTBP1	5725	down	1.82129	0.00205574	Cell Differentiation
PURA	5813	down	1.69771	0.000832	Cell cycle, Cell proliferation and Regulation of apoptosis
PURA	5813	down	1.69771	0.000832	Cell Proliferation
RAD54B	25788	down	2.93523	0.00125306	Cell cycle, Cell division
REPS1	85021	down	1.93414	0.00177304	Cell division and regulation of apoptosis
RGS12	6002	down	2.67874	0.0338291	Cell division
RHEB	6009	down	1.68284	0.0194263	Cell division, Cell proliferation and Regulation of apoptosis
RHEB	6009	down	1.68284	0.0194263	Cell Cycle
SDC1	6382	down	1.72571	0.0104263	Cell cycle, Cell differentiation, Cell proliferation and Regulation of apoptosis
SEMA4F	10505	down	2.01717	0.0138317	Cell Differentiation
SERPINB5	5268	down	4.50358	0.0118525	Cell cycle, Cell division, Cell proliferation and Regulation of apoptsis
SFRS3	6428	down	2.36402	0.0011417	Cell cycle, Cell division, Cell proliferation
SLC30A4	7782	down	5.40859	0.0132897	Cell cycle and Regulation of apoptosis
SLC8A1	6546	down	4.25266	0.00710166	Regulation of Apoptosis
SMC1A	8243	down	2.10345	0.0240849	Cell Cycle
SPAG5	10615	down	1.80625	0.0115213	Cell Cycle
SPATA6	54558	down	3.32473	0.01853	Cell differentiation
SPATA6	54558	down	3.32473	0.01853	Cell Differentiation
SRPRB	58477	down	1.56044	0.0133821	Cell cycle, Cell division
ST14	6768	down	3.48726	0.0300482	Cell differentiation, Cell cycle, Cell proliferation
SUMO2	6613	down	1.6539	0.00141636	Cell cycle, Cell division
TBX15	6913	down	2.90465	0.0131301	Cell differentiation
TCF12	6938	down	2.03232	0.00310761	Cell proliferation
TES	26136	down	1.5257	0.00724349	Cell differentiation and Regulation of apoptosis
TES	26136	down	1.5257	0.00724349	Cell Proliferation
TFR2	7036	down	1.68781	0.0128831	Cell proliferation
TJP2	9414	down	2.87517	0.0488937	Regulation of Apoptosis
TMED10	10972	down	1.99593	0.00504203	Cell proliferation and Regulation of apoptosis
TNFAIP8	25816	down	2.09489	0.000477	Regulation of Apoptosis
TNFAIP8	25816	down	2.09489	0.000477	Regulation of Apoptosis
TPD52	7163	down	2.02464	0.00900453	Cell Differentiation
TREX1	11277	down	1.94566	0.00429334	Cell cycle
TSNAX	7257	down	1.63255	0.0073421	Cell division, Cell differentiation, Cell proliferation
TSPAN7	7102	down	1.62567	0.00962203	Cell proliferation
UACA	55075	down	2.81702	0.0172855	Regulation of Apoptosis
UBC	7316	down	2.3433	0.0397857	Cell Cycle, Regulation of Apoptosis
UBE2N	389898	down	1.73756	0.00221528	Cell cycle, Cell division, Cell proliferation
UNC5C	8633	down	2.10296	0.0458335	Regulation of Apoptosis
USP22	23326	down	1.50377	0.0092386	Cell Cycle
VEGFC	7424	down	1.64327	0.010348	Cell Proliferation, Cell Differentiation
WBP2NL	164684	down	6.78741	0.00230482	Cell cycle, cell division
WDR5	11091	down	1.73708	0.0155569	Cell cycle, Cell differentiation, Cell proliferation
XPNPEP1	7511	down	2.57517	0.000318	Regulation of Apoptosis
ZAN	7455	down	2.3578	0.0460469	Cell differentiation
ZMYND11	10771	down	2.14421	0.0049894	Cell cycle, Cell division, Cell proliferation
ZMYND11	10771	down	2.14421	0.0049894	Cell Cycle. Cell proliferation
